# Supplementary material
Source: PubMed Central journal article supplement (PMC4432641)
Supplement: ncomms8086-s1.pdf [file ncomms8086-s1.pdf]

## Supplementary Figure 1

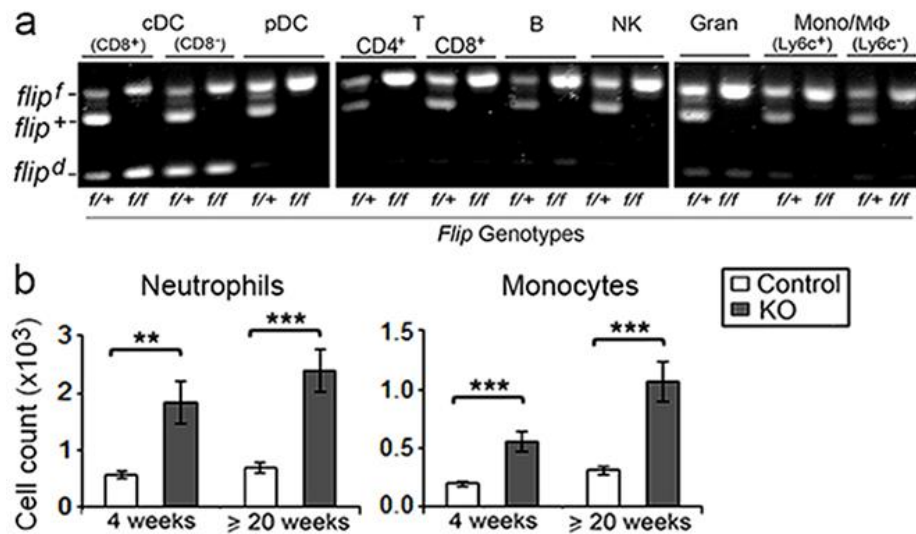

**Supplementary Figure 1. Generation of mouse line with conditional deletion of *Flip* in cDCs results in increased circulating neutrophils and monocytes.** (a) PCR genotyping for *Flip*, employed 3 primers: (1) 5'-CTT TTG GCT TTT GGA TCA GTC ATT-3', (2) 5'- GGA ACC ACG AGA AGC CAA CAT-3' and (3) 5'-TCT CTA ACT CAT TCA GCT TCA ACC ACC A-3'. Alleles of *Flip* include the wild-type (*Flip*<sup>+</sup>, 220bp, primers 1 and 2), the floxed (*Flip*<sup>f</sup>, 270bp, primers 1 and 2) and the deleted (*Flip*<sup>d</sup>, 150bp, primers 1 and 3). CD11c directed floxed *Flip* deletion in different cell types was examined employing cells purified from spleens of mice genotyped as *Flip*<sup>lox/+</sup> *CD11c*<sup>cre</sup> (control) or *Flip*<sup>lox/lox</sup> *CD11c*<sup>cre</sup> (KO). (b) Neutrophils and monocytes were identified from complete blood counts (n = 14-16 for 4 weeks and 8-11 for ≥20 weeks). The data are presented as the mean ±1 SE. (\*\* p < 0.01 and \*\*\* p < 0.001, unpaired 2 sided *t*-test).

## Supplementary Figure 2

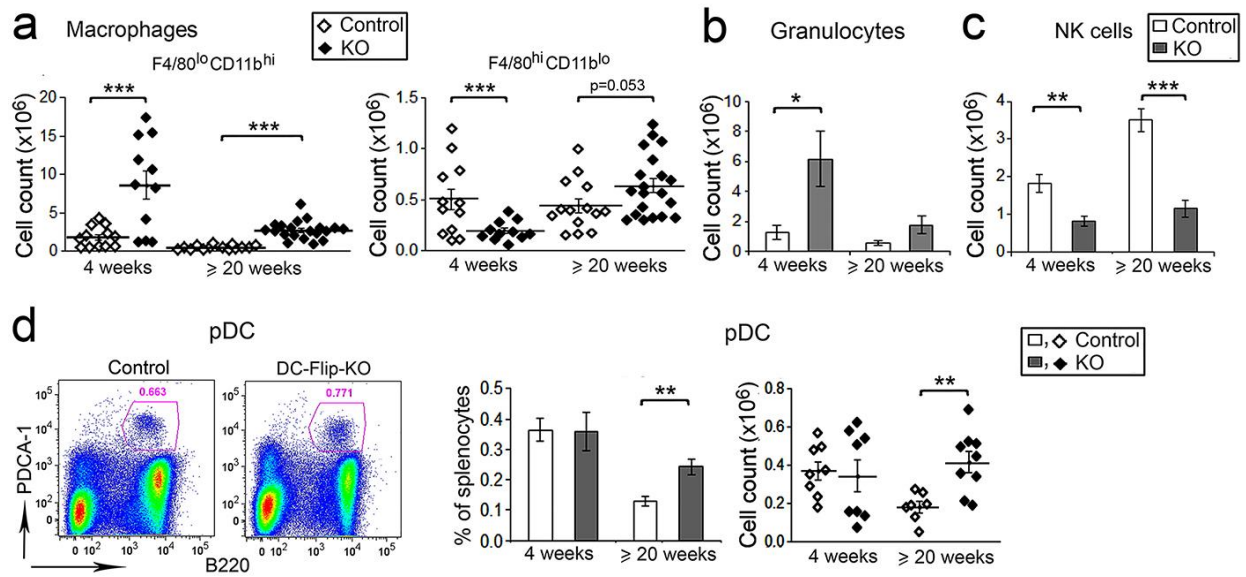

**Supplementary Figure 2: Alteration of cells in the spleen of CD11c-Flip-KO mice.** (a) Flow cytometry was employed to identify macrophages, defined as CD64<sup>+</sup>F4/80<sup>lo</sup>CD11b<sup>hi</sup> or CD64<sup>+</sup>F4/80<sup>hi</sup>CD11b<sup>lo</sup>, (b) granulocytes (9-20 per group), defined as CD64<sup>-</sup>CD11b<sup>hi</sup>Ly6G<sup>+</sup>, (c) NK cells (n = 5 per group), defined as TCRαβ<sup>-</sup>CD11c<sup>lo</sup>NK1.1<sup>+</sup>DX5<sup>+</sup> and (d) plasmacytoid DCs (pDC), defined as CD64<sup>-</sup>PDCA-1<sup>+</sup>B220<sup>+</sup>CD11c<sup>lo</sup>, employing CD11c-Flip-KO (KO) or control mice. The data are presented as the mean ± 1 SE. (\*\* represents p < 0.01 and \*\*\* p < 0.001, unpaired 2-sided *t*-test).

### Supplementary Figure 3

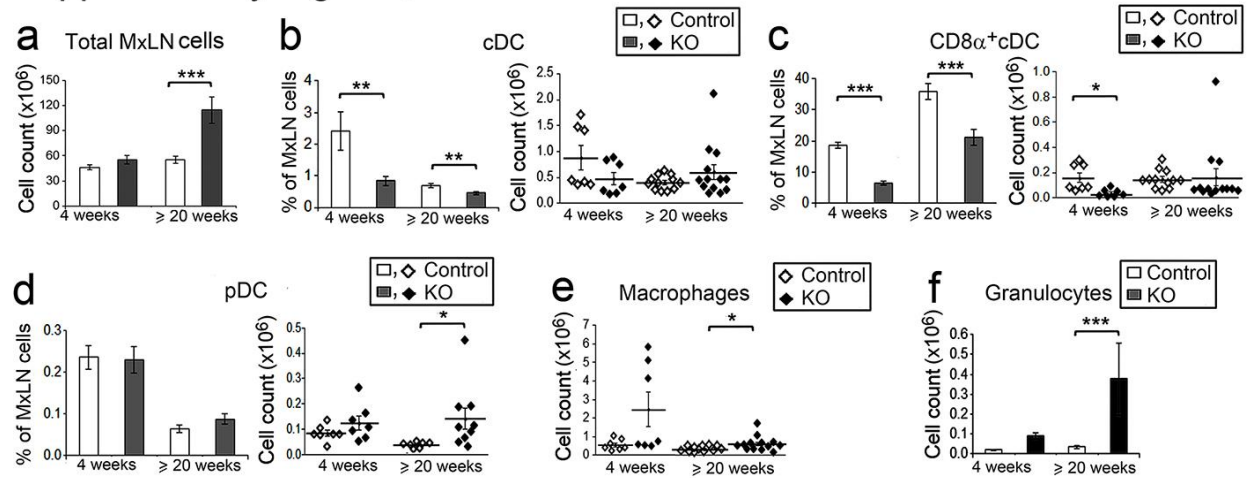

**Supplementary Figure 3: Alteration of cells in the MxLN of CD11c-Flip-KO mice.** (a) The number of cells in the mixed lymph nodes (MxLNs) ( $n = 24-29$  per group), a mixture of cervical, brachial, axillary, and inguinal LNs, were increased at  $\geq 20$  weeks in the CD11c-Flip-KO (KO) mice. (b-g) MxLN cells analyzed by flow cytometry for (b) total CD11c<sup>+</sup> DC, (c) the CD8 $\alpha$ <sup>+</sup> cDC subset, (d) pDC, (e) macrophages, defined as CD64<sup>+</sup>F4/80<sup>+</sup>CD11b<sup>+</sup>, and (f) granulocytes ( $n = 4$  at 4 weeks and 13-16 at  $\geq 20$  weeks). The data are presented as the mean  $\pm 1$  SE. (\* represents  $p < 0.05$ , \*\*  $p < 0.01$  and \*\*\*  $p < 0.001$ , unpaired 2-sided *t*-test).

## Supplementary Figure 4

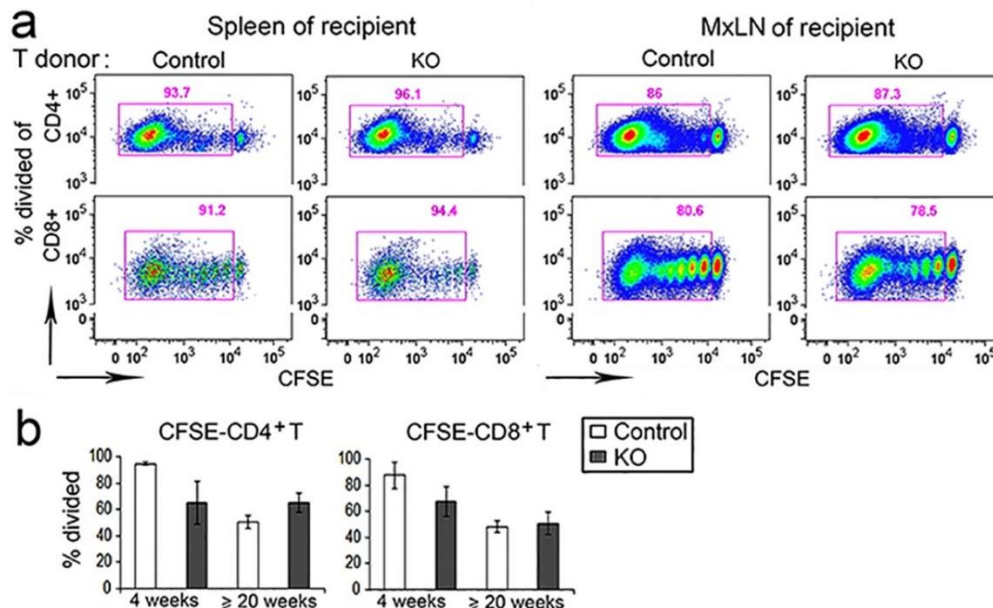

**Supplementary Figure 4: Normal CD11c-Flip-KO T cell expansion and proliferation.** (a) The homeostatic proliferation of total T cells from DC-Flip-KO (KO) or littermate controls was examined *in vivo* by adoptive transfer into *Rag*<sup>-/-</sup> mice, employing CFSE-labelled T cells ( $10\text{-}20 \times 10^6$   $200 \mu\text{l}^{-1}$  PBS), supplemented with B cells ( $5 \times 10^6$ ). Data shown are representative for spleen (left) and MxLNs (right) from the recipients collected 6 days after transfer. The results are representative of 3 independent experiments. (b) *In vitro* anti-CD3/CD28 induced T cell proliferation. CFSE-labelled T cells were from the spleens of DC-Flip-KO or littermate control mice ( $n = 3\text{-}4$  per group). They were cultured with plate bound anti-CD3 monoclonal antibody ( $1 \mu\text{g ml}^{-1}$ ) in the presence of anti-CD28 ( $1 \mu\text{g ml}^{-1}$ ) for 3 days. T cell activation was assessed by the percent reduction of CFSE in the CD4<sup>+</sup> or CD8<sup>+</sup> cell populations, determined by flow cytometry. The data are presented as the mean  $\pm 1$  SE.

## Supplementary Figure 5

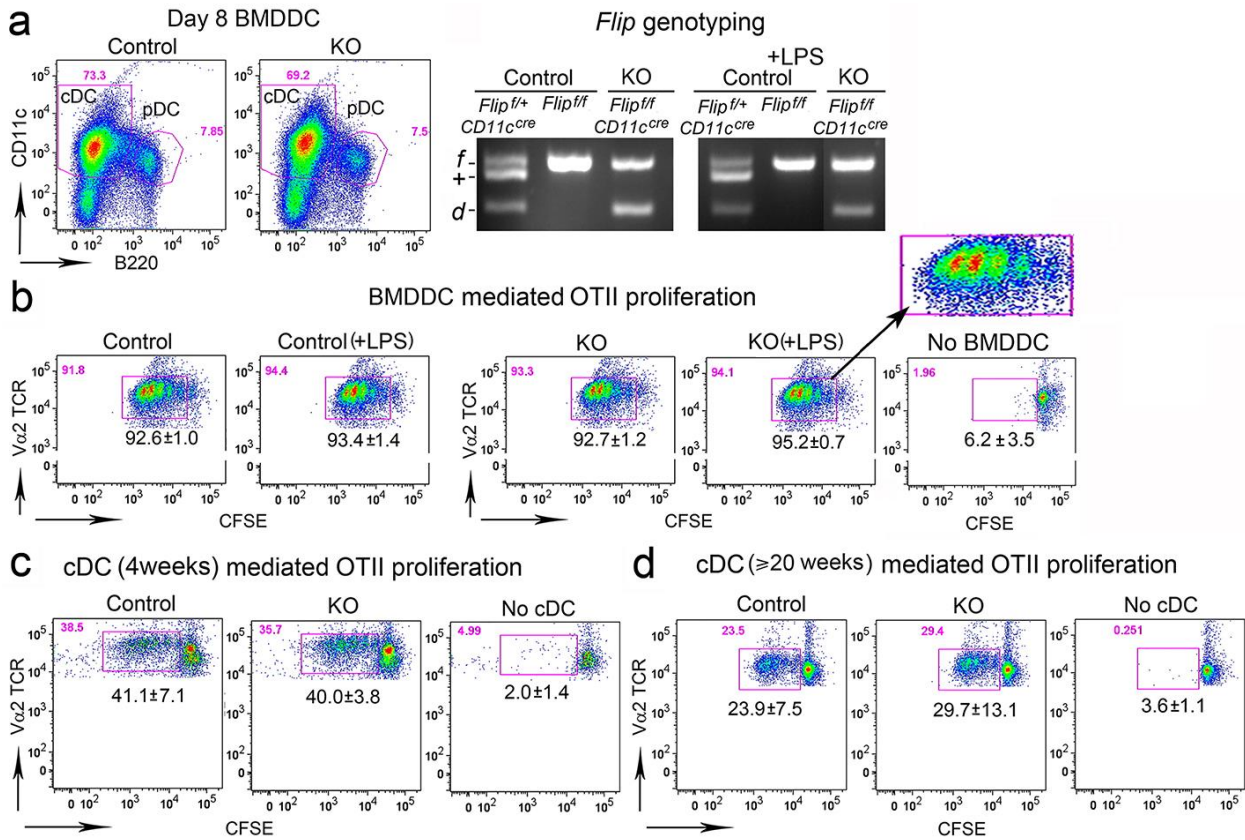

### Supplementary Figure 5. No defect of antigen presentation by CD11c from DC-Flip-KO mice. (a)

Bone marrow differentiated DCs (BMDDC) from control or CD11c-Flip-KO (KO) mice were gated as CD64<sup>+</sup>CD11c<sup>+</sup>B220<sup>-</sup> and pDCs are identified as CD64<sup>+</sup>CD11c<sup>lo</sup>B220<sup>+</sup> (representative of  $\geq 5$ ). The deletion of *Flip* is confirmed by PCR genotyping (right panel), as described in Supplementary Figure 1. (b) BMDDC were examined for their ability to present OVA peptide to CD4<sup>+</sup> OTII-T cells, utilizing  $0.5 \times 10^4$  BMDDC and  $1 \times 10^5$  CFSE labelled CD4<sup>+</sup>OTII-T cells. The results are presented as mean  $\pm$  SE in each representative histogram (n = 3). An example of divided cells in the gated box is enlarged. (c-d) CD11c<sup>+</sup> DCs were isolated from the spleens of 4 week (c) and  $\geq 20$  week (d) mice and employed as antigen presenting cells. Data presented are from experiments employing  $2 \times 10^4$  purified DCs and  $1 \times 10^5$  CFSE-CD4<sup>+</sup>OTII-T cells. Proliferation of CD4<sup>+</sup>OTII-T cells was determined by the dilution of CFSE, the % of divided cells in CD4<sup>+</sup> Vα2<sup>+</sup> population is presented as the mean  $\pm$  SE for 3-4 mice in each age group.

## Supplementary Figure 6

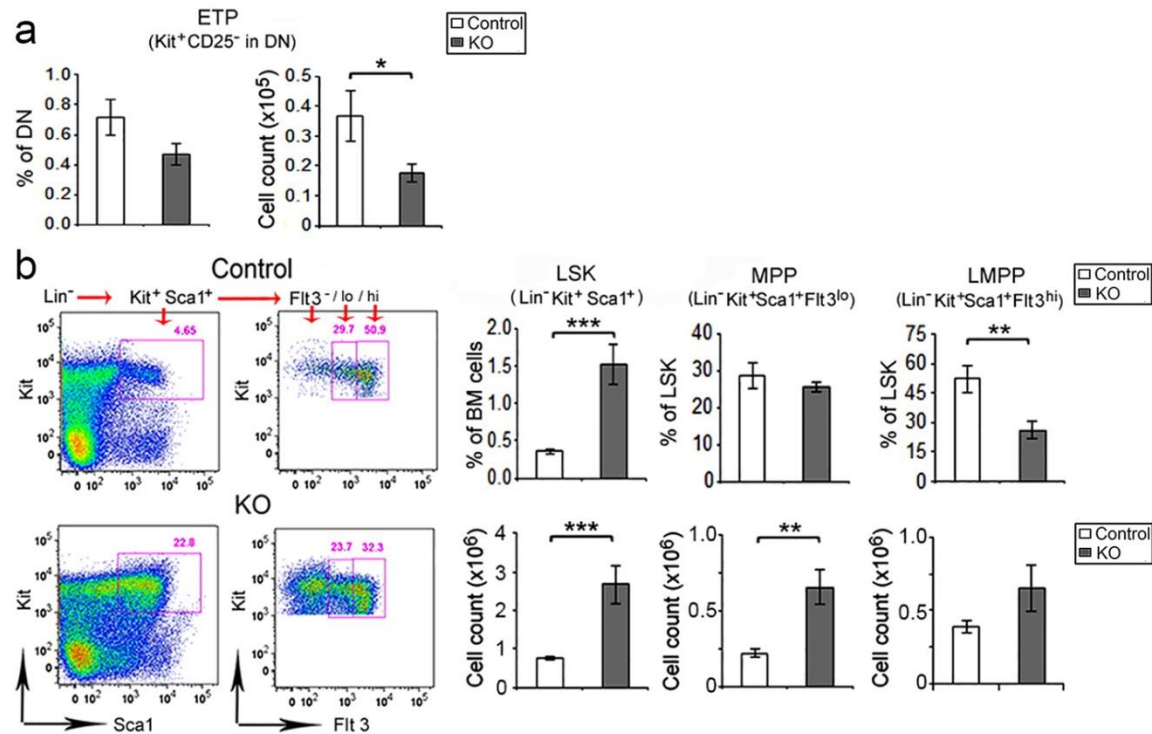

**Supplementary Figure 6. Progenitor cells in thymus and bone marrow.** (a) Early thymic progenitors (ETP) are defined in CD4<sup>-</sup>CD8<sup>-</sup> (DN) thymic cells and Kit<sup>+</sup>CD25<sup>-</sup> (n = 10-11 per group) in the CD11c-Flip-KO (KO) and control mice. (b) Hematopoietic progenitors in the bone marrow are analyzed by Flow. The lineage antigens included CD3, CD11b, CD19, B220, Gr-1 and Ter119. The hematopoietic stem cells were identified as Lin<sup>-</sup>Kit<sup>+</sup>Sca1<sup>+</sup> (LSK), and they give rise to downstream multipotent progenitor (MPP, Lin<sup>-</sup>Scal<sup>+</sup>Kit<sup>+</sup>Flt3<sup>lo</sup>), which in turn produce lymphoid-primed multipotent progenitor (LMPP, Lin<sup>-</sup>Scal<sup>+</sup>Kit<sup>+</sup>Flt3<sup>hi</sup>). The DC-Flip-KO and littermate control mice (n = 7 per group) were examined at 4 weeks of age. The data are presented as the mean ±1 SE. (\* represents p < 0.05, \*\* p < 0.01 and \*\*\* p < 0.001, unpaired 2-sided t-test).

# Supplementary Figure 7

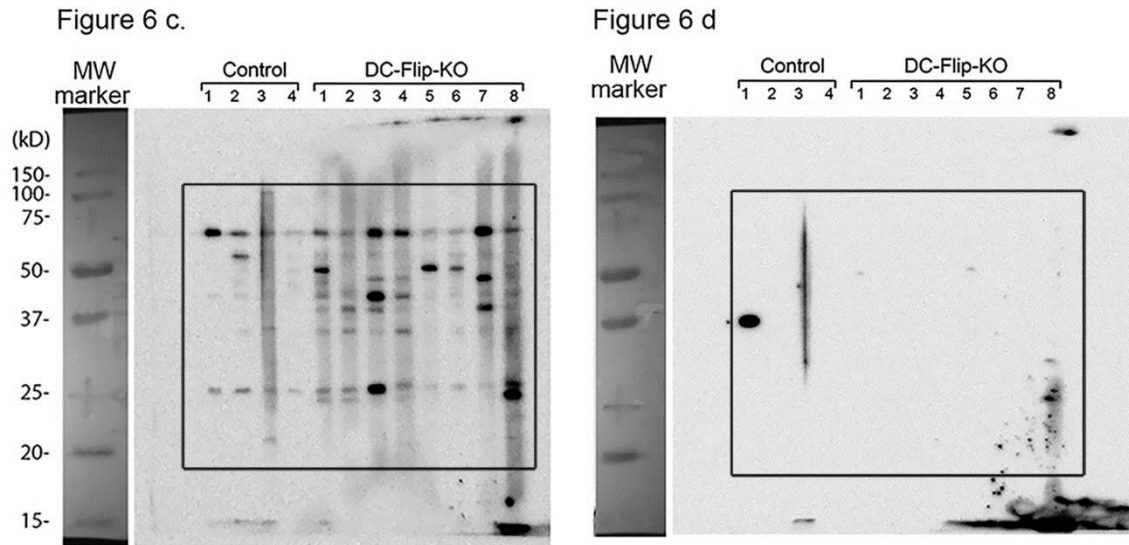

**Supplementary Figure 7. The full western blots in Figure 6c and 6d.**

The black boxes represent the areas shown in Figure 6. The molecular weight (MW) images were taken from the same gel developed separately.
